# Supplementary material for: A Multilevel Multidimensional Finite Mixture Item Response Model to Cluster Respondents and Countries
Source: Atypon-hosted journal article supplement (doi:10.1027/1015-5759/a000631), 2020-12-30
Supplement: 1015-5759_a000631_esm1.pdf [file 1015-5759_a000631_esm1.pdf]

**Electronic Supplementary Material**

*ESM 1: Tables*

*Table E1a. List of unidimensional IRT models for ordinal polytomous responses with constraints on the discrimination indices, and constraints on the difficulty levels.*

| discrimination indices | difficulty levels | parameterization                          | model     |
|------------------------|-------------------|-------------------------------------------|-----------|
| free                   | free              | $\gamma_j(\theta - \beta_{jx})$           | GRM       |
| free                   | constrained       | $\gamma_j[(\theta - (\beta_j + \tau_x))]$ | RS-GRM    |
| constrained            | free              | $\theta - \beta_{jx}$                     | 1P-GRM    |
| constrained            | constrained       | $\theta - (\beta_j + \tau_x)$             | 1P-RS-GRM |

*Table E1b. Distribution of the FSCRS item responses (raw percentage frequencies)*

| Item            | Response category |      |      |      |      | Total |
|-----------------|-------------------|------|------|------|------|-------|
|                 | 0                 | 1    | 2    | 3    | 4    |       |
| Inadequate Self |                   |      |      |      |      |       |
| 1               | 13.7              | 26.1 | 24.5 | 23.2 | 12.5 | 100.0 |
| 2               | 14.9              | 26.5 | 21.0 | 24.4 | 13.2 | 100.0 |
| 4               | 23.9              | 29.8 | 21.9 | 17.3 | 7.1  | 100.0 |
| 6               | 13.7              | 24.2 | 20.8 | 25.7 | 15.6 | 100.0 |
| 7               | 25.9              | 26.4 | 21.1 | 17.3 | 9.3  | 100.0 |
| 14              | 15.2              | 29.0 | 23.5 | 21.0 | 11.3 | 100.0 |
| 17              | 19.4              | 29.2 | 23.0 | 18.9 | 9.5  | 100.0 |
| 18              | 13.7              | 26.1 | 27.7 | 23.4 | 9.1  | 100.0 |
| 20              | 12.2              | 19.1 | 21.4 | 27.1 | 20.2 | 100.0 |
| Mean            | 17.0              | 26.3 | 22.7 | 22.0 | 12.0 | 100.0 |
| Reassured Self  |                   |      |      |      |      |       |
| 3               | 14.2              | 36.2 | 27.8 | 16.6 | 5.2  | 100.0 |
| 5               | 8.3               | 22.8 | 30.1 | 27.6 | 11.2 | 100.0 |
| 8               | 32.0              | 35.3 | 19.7 | 9.5  | 3.5  | 100.0 |
| 11              | 26.9              | 37.0 | 22.0 | 10.7 | 3.4  | 100.0 |
| 13              | 13.7              | 28.1 | 28.6 | 20.7 | 8.9  | 100.0 |
| 16              | 8.8               | 25.2 | 32.9 | 24.1 | 9.0  | 100.0 |
| 19              | 34.7              | 35.2 | 19.7 | 8.4  | 2.0  | 100.0 |
| 21              | 26.8              | 36.7 | 23.0 | 10.2 | 3.3  | 100.0 |
| Mean            | 20.6              | 32.1 | 25.5 | 16.0 | 5.8  | 100.0 |
| Hated Self      |                   |      |      |      |      |       |
| 9               | 70.5              | 13.0 | 7.4  | 5.2  | 3.9  | 100.0 |
| 10              | 57.1              | 19.7 | 11.2 | 7.7  | 4.3  | 100.0 |
| 12              | 56.0              | 23.2 | 13.1 | 5.4  | 2.3  | 100.0 |
| 15              | 48.0              | 22.7 | 14.3 | 10.1 | 4.9  | 100.0 |
| 22              | 56.1              | 22.4 | 11.4 | 6.1  | 4.0  | 100.0 |
| Mean            | 57.5              | 20.2 | 11.5 | 6.9  | 3.9  | 100.0 |

Table E1c. Descriptives of raw scores of sub-dimensions of the FSCRS

| Country | Inadequate Self |      |    | Reassured Self |      |    | Hated Self |      |    |
|---------|-----------------|------|----|----------------|------|----|------------|------|----|
|         | M               | SD   | Md | M              | SD   | Md | M          | SD   | Md |
| AUS     | 15.61           | 9.00 | 15 | 12.76          | 7.02 | 12 | 3.42       | 4.12 | 2  |
| CAN     | 17.99           | 8.17 | 18 | 11.41          | 5.96 | 11 | 3.18       | 3.58 | 2  |
| CH      | 17.97           | 8.54 | 18 | 15.36          | 7.63 | 15 | 4.72       | 4.32 | 4  |
| ISR     | 12.25           | 7.68 | 11 | 10.33          | 6.35 | 9  | 1.75       | 2.97 | 0  |
| ITA     | 15.20           | 7.77 | 15 | 12.14          | 5.70 | 12 | 3.25       | 3.56 | 2  |
| JAP     | 24.13           | 6.25 | 25 | 15.48          | 5.73 | 16 | 9.57       | 4.47 | 10 |
| NL      | 14.70           | 7.16 | 14 | 10.50          | 5.43 | 10 | 2.93       | 3.65 | 2  |
| POR     | 13.33           | 7.66 | 13 | 11.99          | 6.09 | 11 | 2.55       | 3.39 | 1  |
| SVK     | 17.02           | 7.46 | 16 | 11.56          | 5.77 | 11 | 4.70       | 3.82 | 4  |
| TAI     | 19.88           | 5.92 | 20 | 11.31          | 4.80 | 11 | 5.49       | 3.72 | 3  |
| UK1     | 17.66           | 8.97 | 17 | 13.79          | 6.75 | 13 | 4.06       | 4.84 | 2  |
| UK2     | 17.71           | 8.29 | 18 | 11.76          | 5.76 | 11 | 3.86       | 4.58 | 2  |
| USA     | 15.68           | 8.19 | 15 | 13.48          | 6.88 | 14 | 3.86       | 4.25 | 2  |
| Total   | 16.72           | 8.32 | 16 | 12.34          | 6.30 | 12 | 3.97       | 4.32 | 3  |

Note. M = Mean; SD = Standard Deviation; Md = Median; AUS Australia (N = 319); CAN Canada (N = 380); CH Switzerland (N = 230); ISR Israel (N = 475); ITA Italy (N = 393); JAP Japan (N = 263); NL Netherlands (N = 363); POR Portugal (N = 764); SVK Slovakia (N = 1,326); TAI Taiwan (N = 417); UK1 United Kingdom 1 (N = 1570); UK2 United Kingdom 2 (N = 883) and USA (N = 331).

Table E1d. Standardized discrimination and difficulties indices

| Item                   | Discriminations | Difficulties / Thresholds |        |       |       |
|------------------------|-----------------|---------------------------|--------|-------|-------|
|                        |                 | 1                         | 2      | 3     | 4     |
| <b>Inadequate Self</b> |                 |                           |        |       |       |
| 1                      | 2.163           | -1.331                    | -0.307 | 0.476 | 1.472 |
| 2                      | 2.263           | -1.266                    | -0.272 | 0.398 | 1.405 |
| 4                      | 1.444           | -1.048                    | 0.162  | 1.066 | 2.297 |
| 6                      | 2.275           | -1.319                    | -0.364 | 0.290 | 1.271 |
| 7                      | 2.384           | -0.783                    | 0.079  | 0.783 | 1.625 |
| 14                     | 1.722           | -1.391                    | -0.190 | 0.646 | 1.714 |
| 17                     | 1.768           | -1.146                    | -0.025 | 0.798 | 1.832 |
| 18                     | 1.316           | -1.701                    | -0.371 | 0.752 | 2.217 |
| 20                     | 1.369           | -1.789                    | -0.726 | 0.140 | 1.341 |
| <b>Reassured Self</b>  |                 |                           |        |       |       |
| 3                      | 1.440           | -1.779                    | -0.049 | 1.161 | 2.525 |
| 5                      | 1.142           | -2.616                    | -0.940 | 0.437 | 2.131 |
| 8                      | 1.927           | -0.721                    | 0.538  | 1.462 | 2.408 |
| 11                     | 1.740           | -0.962                    | 0.440  | 1.472 | 2.552 |
| 13                     | 1.939           | -1.591                    | -0.344 | 0.688 | 1.770 |
| 16                     | 1.656           | -2.095                    | -0.657 | 0.577 | 1.885 |
| 19                     | 1.266           | -0.759                    | 0.777  | 2.048 | 3.536 |
| 21                     | 1.360           | -1.083                    | 0.471  | 1.711 | 2.983 |
| <b>Hated Self</b>      |                 |                           |        |       |       |
| 9                      | 1.562           | 0.784                     | 1.417  | 1.969 | 2.663 |
| 10                     | 2.167           | 0.223                     | 0.896  | 1.457 | 2.204 |

|    |       |        |       |       |       |
|----|-------|--------|-------|-------|-------|
| 12 | 1.648 | 0.225  | 1.153 | 2.048 | 2.958 |
| 15 | 1.382 | -0.092 | 0.820 | 1.604 | 2.674 |
| 22 | 2.231 | 0.207  | 0.978 | 1.587 | 2.228 |

---
